# Supplementary material
Source: PubMed Central journal article supplement (PMC4009497)
Supplement: 1301009_JI_1301009_Supplemental_Table_1.pdf [file 1301009_JI_1301009_Supplemental_Table_1.pdf]

**SUPPLEMENTAL MATERIAL - Aneurismal Lesions of Patients with Abdominal Aortic Aneurysm (AAA) contain clonally expanded T cells.**

**Lu et al.**

**Table 1. Primers used for human  $\beta$ -chain TCR cDNA synthesis and PCR amplification.**

| Primer                                             | Sequence                                                         |
|----------------------------------------------------|------------------------------------------------------------------|
| NotI-oligo(dT) <sub>15</sub>                       | T <b>GCGGCCGC</b> TTTTTTTTTTTTTTTTT                              |
| <b>NPA-PCR</b>                                     |                                                                  |
| Nonpalindromic adaptor                             | 5' -AATTCGAACCCCTTCGAGAATGCG-3'<br>3' -GCTTGGGGAAGCTCTTACGC-p-5' |
| <b>5' end primer:</b>                              |                                                                  |
| Adaptor primer                                     | AATTCGAACCCCTTCGAGAATGCG                                         |
| <b>3' end primer:</b>                              |                                                                  |
| hC $\beta$ 3                                       | CAGGCAGTATCTGGAGTCATTGA      203 bp 3' of J $\beta$              |
| hC $\beta$ 2                                       | ACCAGCTCAGCTCCACGTGGTC      113 bp 3' of J $\beta$               |
| hC $\beta$ 1                                       | TTCTGATGGCTCAAACACAGCGACCTC      28 bp 3' of J $\beta$           |
| <b>V<math>\beta</math>-specific amplifications</b> |                                                                  |
| <b>5' end primer:</b>                              |                                                                  |
| V $\beta$ 1 <sub>sp</sub> 5'                       | CCGCACAACAGTTCCCTGACTTGC                                         |
| V $\beta$ 2 <sub>sp</sub> 5'                       | GGCCACATACGAGCAAGGCGTCGA                                         |
| V $\beta$ 3 <sub>sp</sub> 5'                       | GTCTCTAGAGAGAAGAAGGAGCGC                                         |
| V $\beta$ 4 <sub>sp</sub> 5'                       | TTCCCATCAGCCGCCCAAACCTAA                                         |
| V $\beta$ 5 <sub>sp</sub> 5'                       | ATACTTCAGTGAGACACAGAGA                                           |
| V $\beta$ 6 <sub>sp</sub> 5'                       | TCTCAGGTGTGATCCAAATTCGGG                                         |
| V $\beta$ 7 <sub>sp</sub> 5'                       | CCTGAATGCCCAACAGCTCTCTC                                          |
| V $\beta$ 8 <sub>sp</sub> 5'                       | CCATGATGCGGGGACTGGAGTTGC                                         |
| V $\beta$ 9 <sub>sp</sub> 5'                       | TTCCCTGGAGCTTGGTGACTCTGC                                         |

|                               |                          |
|-------------------------------|--------------------------|
| V $\beta$ 10 <sub>sp</sub> 5' | CCACGGAGTCAGGGGACACAGCAC |
| V $\beta$ 11 <sub>sp</sub> 5' | TGCCAGGCCCTCACATACCTCTCA |
| V $\beta$ 12 <sub>sp</sub> 5' | TGTCACCAGACTGGGAACCACCAC |
| V $\beta$ 13 <sub>sp</sub> 5' | CACTGCGGTGTACCCAGGATATGA |
| V $\beta$ 14 <sub>sp</sub> 5' | GGGCTCGGCTTAAGGCAGACCTAC |
| V $\beta$ 15 <sub>sp</sub> 5' | CAGGCACAGGCTAAATTCTCCCTG |
| V $\beta$ 16 <sub>sp</sub> 5' | GCCTGCAGAACTGGAGGATTCTGG |
| V $\beta$ 17 <sub>sp</sub> 5' | TCCTCTCACTGTGACATCGGCCCA |
| V $\beta$ 18 <sub>sp</sub> 5' | CTGCTGAATTTCCCAAAGAGGGCC |
| V $\beta$ 19 <sub>sp</sub> 5' | TCTCAATGCCCCAAGAACGCACCC |
| V $\beta$ 20 <sub>sp</sub> 5' | TGCCCCAGAATCTCTCAGCCTCCA |
| V $\beta$ 21 <sub>sp</sub> 5' | GATTCACAGTTGCCTAAGGA     |
| V $\beta$ 22 <sub>sp</sub> 5' | AAGTGATCTTGCCTGTGTCCCCA  |
| V $\beta$ 23 <sub>sp</sub> 5' | GCAGGGTCCAGGTGAGGACCCCCA |
| V $\beta$ 24 <sub>sp</sub> 5' | CCCAGTTTGGAAAGCCAGTGACCC |

---
